# Supplementary material for: Novel Acinetobacter baumannii Myovirus TaPaz Encoding Two Tailspike Depolymerases: Characterization and Host-Recognition Strategy
Source: MDPI journal article supplement (doi:10.3390/v13060978), 2021-05-25
Supplement: s1 [file s1]

# Supplementary Materials

**Table S1. *Acinetobacter baumannii* strains used in this study for phage and TSDs specificities determination**

| K-type            | <i>A. baumannii</i> strains with confirmed CPS structure | KL GenBank accession number or coordinates within whole genome shotgun sequences |
|-------------------|----------------------------------------------------------|----------------------------------------------------------------------------------|
| 1                 | AYE                                                      | CU459141 (base position range: 3863316-3834156)                                  |
| 2                 | ACICU                                                    | CP000863 (base position range: 85537- 29488)                                     |
| 3/22 <sup>a</sup> | ATCC17978/LUH5537                                        | CP000521 (base position range: 56835-79908)/<br>KC526920                         |
| 6                 | RBH4                                                     | KF130871                                                                         |
| 7                 | LUH5533                                                  | KC526894                                                                         |
| 8                 | BAL097                                                   | KX712116                                                                         |
| 9                 | B05                                                      | MK331712                                                                         |
| 11                | LUH5545                                                  | KC526904                                                                         |
| 15                | LUH5554                                                  | KC526900                                                                         |
| 16                | D4                                                       | MF522813                                                                         |
| 17                | G7                                                       | KC118541                                                                         |
| 19                | 28                                                       | KU215659                                                                         |
| 20                | A388                                                     | JQ684178                                                                         |
| 21                | G21                                                      | MG231275                                                                         |
| 24                | RCH51                                                    | KX756650                                                                         |
| 25                | AB5075                                                   | BK008886                                                                         |
| 27                | 4190                                                     | KT266827                                                                         |
| 30                | NIPH190                                                  | MN166189                                                                         |
| 32                | LUH5549                                                  | KC526897                                                                         |
| 33                | NIPH67                                                   | MN166195                                                                         |
| 35                | LUH5535                                                  | KC526896                                                                         |
| 37                | NIPH146                                                  | APOU01000009 (base position range: 32574-53092)                                  |
| 42                | LUH5550                                                  | KC526903                                                                         |
| 43                | LUH5544                                                  | KC526905                                                                         |
| 44                | NIPH70                                                   | APRC01000043 (base position range: 97989-129118)                                 |
| 45                | NIPH201                                                  | MN166190                                                                         |
| 46                | NIPH329                                                  | MK609549                                                                         |
| 47                | NIPH601                                                  | MN166193                                                                         |
| 48                | NIPH615                                                  | MN166191                                                                         |
| 51                | WM98b                                                    | MN148384                                                                         |
| 52                | LUH5546                                                  | KC526899                                                                         |
| 53                | D23                                                      | MH190222                                                                         |
| 54                | RCH52                                                    | MG867726                                                                         |

|     |            |                                                     |
|-----|------------|-----------------------------------------------------|
| 55  | BAL204     | MN148381                                            |
| 57  | BAL212     | KY434631                                            |
| 58  | BAL114     | KT359617                                            |
| 61  | NL4        | to be registered                                    |
| 73  | SGH0703    | MF362178                                            |
| 74  | BAL309     | MN148383                                            |
| 80  | LUH3712    | KC526914                                            |
| 81  | LUH3713    | KC526916                                            |
| 82  | LUH5534    | KC526908                                            |
| 83  | LUH5538    | KC526898                                            |
| 84  | LUH5540    | KC526902                                            |
| 85  | LUH5543    | KC526913                                            |
| 87  | LUH5547    | KC526918                                            |
| 88  | LUH5548    | KC526910                                            |
| 89  | LUH5552    | KC526919                                            |
| 90  | LUH5553    | KC526917                                            |
| 91  | 1053       | KM402814                                            |
| 92  | B8300      | CP021347 ( base position<br>range: 1420707-1451977) |
| 93  | B11911     | BK010902                                            |
| 116 | MAR-303    | MK399425                                            |
| 125 | MAR13-1452 | MH306195                                            |
| 128 | KZ-1093    | MK399428                                            |

<sup>a</sup> These KL clusters are closely related, though contain a little difference at the nucleotide level, but produce CPSs with identical structures.
